# Supplementary material
Source: MDPI journal article supplement (https://www.mdpi.com/1999-4907/14/6/1213)
Supplement: s1 [file s1]

---

# Effects of *Ficus carica* L. Water Extract on *Taxus cuspidata* Sieb. et Zucc. Growth

**Qianqian Li**<sup>1,2,3,4,†</sup>, **Jin Huang**<sup>1,2,3,4,†</sup>, **Xue Yang**<sup>1,2,3,4</sup>, **Zarina Gul**<sup>1,2,3,4</sup>, **Wenxue Sun**<sup>1,2,3,4</sup>, **Bin Qiao**<sup>1,2,3,4</sup>, **Jiabo Cheng**<sup>1,2,3,4</sup>, **Chunying Li**<sup>1,2,3,4,\*</sup> and **Chunjian Zhao**<sup>1,2,3,4</sup>

1 Key Laboratory of Forest Plant Ecology, Ministry of Education, Northeast Forestry University, Harbin 150040, China; lqq21@nefu.edu.cn (Q.L.); huangjin@nefu.edu.cn (J.H.); klp20yx@nefu.edu.cn (X.Y.); zarminagul@nefu.edu.cn (Z.G.); klp22swx@nefu.edu.cn (W.S.); klp20qb@nefu.edu.cn (B.Q.); ccwj11@nefu.edu.cn (J.C.); zcj@nefu.edu.cn (C.Z.)

2 College of Chemistry, Chemical Engineering and Resource Utilization, Northeast Forestry University, Harbin 150040, China

3 Engineering Research Center of Forest Bio-Preparation, Ministry of Education, Northeast Forestry University, Harbin 150040, China

4 Heilongjiang Provincial Key Laboratory of Ecological Utilization of Forestry-Based Active Substances, Harbin 150040, China

\* Correspondence: lcy@nefu.edu.cn; Tel./Fax: +86-451-8219-0848

† These authors contributed equally to this work.

Table S1 Chemicals in *F. carica* root water extract

| Type of compound | RT (min) | Formula                                        | [M-H]-/<br>[M+H] <sup>+</sup> | Main Ms/Ms product ions                                           | Proposed compound | Theoretical Mass (m/z) | Measured value (m/z) | Error (×10 <sup>-6</sup> ) |
|------------------|----------|------------------------------------------------|-------------------------------|-------------------------------------------------------------------|-------------------|------------------------|----------------------|----------------------------|
| Coumarins        | 3.94     | C <sub>9</sub> H <sub>6</sub> O <sub>4</sub>   | 179.0331[M+H] <sup>+</sup>    | 151.0382,133.0281,123.0437,105.0338,<br>95.0492,77.0388,68.9974   | Esculetin         | 179.0339               | 179.0332             | -3.91                      |
|                  | 4.88     | C <sub>11</sub> H <sub>6</sub> O <sub>4</sub>  | 203.0332[M+H] <sup>+</sup>    | 75.0232,91.0543,95.0494,129.0331,<br>131.0487,147.0433,175.0383   | Xanthotoxol       | 202.0266               | 202.0259             | -3.47                      |
|                  | 4.89     | C <sub>11</sub> H <sub>6</sub> O <sub>4</sub>  | 203.0330[M+H] <sup>+</sup>    | 175.0384,159.0433,147.0434,141.0692,<br>131.0486,129.0331,91.0543 | Bergaptol         | 203.0339               | 203.0330             | -4.43                      |
|                  | 5.57     | C <sub>9</sub> H <sub>6</sub> O <sub>3</sub>   | 163.0384[M+H] <sup>+</sup>    | 53.0391,65.0389,89.0386,95.0492,<br>107.0490,119.0489             | Umbelliferone     | 162.0317               | 162.0311             | -3.70                      |
|                  | 6.77     | C <sub>14</sub> H <sub>12</sub> O <sub>3</sub> | 229.0852[M+H] <sup>+</sup>    | 213.0537,183.3129,157.0642,128.0615,<br>115.0539,99.8178,76.3746  | Angenomalin       | 229.0859               | 229.0852             | -3.06                      |

|            |       |                                                               |                            |                                                                   |                   |          |          |       |
|------------|-------|---------------------------------------------------------------|----------------------------|-------------------------------------------------------------------|-------------------|----------|----------|-------|
|            |       |                                                               |                            |                                                                   |                   |          |          |       |
|            | 6.83  | C <sub>14</sub> H <sub>12</sub> O <sub>3</sub>                | 229.0851[M+H] <sup>+</sup> | 61.7412,73.2895,87.3019,115.0539,<br>128.0615,157.0648,213.0544   | Trioxsalen        | 228.0786 | 228.0778 | -3.51 |
|            | 8.17  | C <sub>14</sub> H <sub>14</sub> O <sub>4</sub>                | 247.0955[M+H] <sup>+</sup> | 91.0543,119.0488,147.0433,175.0381,<br>185.0589                   | Nodakenetin       | 246.0892 | 246.0881 | -4.42 |
|            | 8.26  | C <sub>14</sub> H <sub>14</sub> O <sub>4</sub>                | 247.0952[M+H] <sup>+</sup> | 229.0849,213.0538,175.0381,147.0433,<br>115.0540,91.0544,68.9975  | Columbianetin     | 247.0965 | 247.0958 | -2.83 |
|            | 9.63  | C <sub>11</sub> H <sub>6</sub> O <sub>3</sub>                 | 187.0382[M+H] <sup>+</sup> | 159.0436,143.0486,131.0486,115.0540,<br>105.0445,95.0492,89.0387  | Psoralen          | 187.0390 | 187.0383 | -3.74 |
|            | 11.21 | C <sub>12</sub> H <sub>8</sub> O <sub>4</sub>                 | 217.0487[M+H] <sup>+</sup> | 202.0251,174.0302,161.0588,146.0354,<br>131.0486,118.0411,89.0386 | Bergapten         | 217.0495 | 217.0490 | -2.30 |
|            | 25.70 | C <sub>21</sub> H <sub>24</sub> O <sub>5</sub>                | 356.1623[M+H] <sup>+</sup> | 84.0734, 116.9266, 203.7526, 280.7447,<br>321.9117                | Rutamarin         | 356.1624 | 356.1623 | -2.81 |
|            | 35.59 | C <sub>11</sub> H <sub>10</sub> O <sub>3</sub>                | 189.0554[M-H] <sup>-</sup> | 64.4360,78.9568,84.1685,91.0164,<br>108.0191,136.5071,165.0006    | 7- Ethoxycoumarin | 190.0630 | 190.0627 | -1.58 |
| Terpenoids | 0.73  | C <sub>13</sub> H <sub>16</sub> N <sub>4</sub> O <sub>6</sub> | 325.1115[M+H] <sup>+</sup> | 326.1148, ,336.5794,337.1090,342.1379,<br>671.1952                | Furaltadone       | 324.1069 | 324.1042 | 8.33  |

|       |                                                               |                            |                                                                  |                                            |          |          |       |
|-------|---------------------------------------------------------------|----------------------------|------------------------------------------------------------------|--------------------------------------------|----------|----------|-------|
| 0.75  | C <sub>3</sub> H <sub>6</sub> N <sub>6</sub> O <sub>5</sub>   | 205.0327[M-H] <sup>-</sup> | 253.0071,337.0745,381.0810,399.0905,<br>411.0713,413.0871        | 1,3-Dinitro-5-nitroso-1,3,5-<br>triazinane | 206.0399 | 206.0394 | -2.43 |
| 5.61  | C <sub>31</sub> H <sub>32</sub> N <sub>4</sub> O <sub>9</sub> | 605.2177[M+H] <sup>+</sup> | 136.1484,257.1786,280.0075,337.0032                              | Cotamine phthalate                         | 604.2057 | 604.2104 | 7.78  |
| 7.23  | C <sub>25</sub> H <sub>22</sub> N <sub>2</sub> O <sub>5</sub> | 431.1651[M+H] <sup>+</sup> | 90.9767,184.0880,259.6032,280.0815,<br>336.7244,410.4415         | Zanamivir Amine Triacetate<br>Methyl Ester | 430.1587 | 430.1579 | -1.86 |
| 10.57 | C <sub>28</sub> H <sub>22</sub>                               | 359.1808[M+H] <sup>+</sup> | 96.0181,143.3853,203.6616,234.1221,<br>257.1088,341.1702         | 9,10-Bis(4-<br>methylphenyl)anthracene     | 358.1721 | 358.1735 | 3.91  |
| 11.20 | C <sub>9</sub> H <sub>3</sub> N <sub>3</sub> O <sub>3</sub>   | 202.0250[M+H] <sup>+</sup> | 63.0233,73.3274,89.0388,118.0408,<br>174.0300,192.8612           | 1,3,5-Triisocyanatobenzene                 | 201.0174 | 201.0178 | 1.99  |
| 15.30 | C <sub>26</sub> H <sub>26</sub> O <sub>9</sub>                | 483.1605[M+H] <sup>+</sup> | 64.4198,136.3201,280.0822,335.9747,393.1639                      | Gilvocarcin M                              | 482.1577 | 482.1533 | -9.13 |
| 26.91 | C <sub>38</sub> H <sub>49</sub> N <sub>3</sub> O <sub>5</sub> | 628.3715[M+H] <sup>+</sup> | 114.5062,135.0027,280.3070,352.4264,<br>371.1017,471.0936        | Bemotrizinol                               | 627.3672 | 627.3644 | -4.46 |
| 27.27 | C <sub>24</sub> H <sub>38</sub> O <sub>4</sub>                | 391.2825[M+H] <sup>+</sup> | 336.7654,256.8141,204.0550,169.9946,<br>114.5522,91.9828,73.2461 | Diocetyl phthalate                         | 390.2770 | 390.2743 | -6.92 |
| 27.76 | C <sub>25</sub> H <sub>35</sub> NO <sub>4</sub>               | 412.2679[M-H] <sup>-</sup> | 64.4214,97.5916,164.9604,280.0219,<br>338.3460                   | Norbuprenorphine                           | 413.2566 | 413.2603 | 8.95  |

|           |       |                                                             |                            |                                                                    |                                     |          |          |       |
|-----------|-------|-------------------------------------------------------------|----------------------------|--------------------------------------------------------------------|-------------------------------------|----------|----------|-------|
|           | 29.56 | C <sub>30</sub> H <sub>46</sub> O <sub>3</sub>              | 455.3166[M+H] <sup>+</sup> | 437.2197,414.2672,406.5328,333.3244,<br>280.4273,178.3247,136.3287 | Wilforlide A                        | 455.3519 | 455.3508 | -2.42 |
|           | 31.46 | C <sub>15</sub> H <sub>22</sub> O <sub>4</sub>              | 265.1453[M-H] <sup>-</sup> | 97.3724,148.0502,164.5571,197.4670,<br>203.5123,220.7796,257.2847  | Zinniol                             | 266.1518 | 266.1526 | 3.01  |
|           | 34.61 | C <sub>17</sub> H <sub>26</sub> O <sub>5</sub>              | 309.1712[M-H] <sup>-</sup> | 64.4856,84.1474,97.5929,134.9214,<br>165.1137,227.2727             | Decyl Gallate                       | 310.1780 | 310.1785 | 1.61  |
|           | 0.69  | C <sub>11</sub> H <sub>6</sub> O <sub>6</sub>               | 235.0166[M+H] <sup>+</sup> | 257.0023,272.9760,365.1039,381.0773,<br>415.0917,491.0158,506.9897 | 4-Azido-3,5-<br>dinitrobenzonitrile | 234.0138 | 234.0131 | -2.99 |
|           | 0.90  | C <sub>21</sub> H <sub>16</sub> O <sub>6</sub>              | 365.1042[M+H] <sup>+</sup> | 97.5559,136.0690,185.0413,203.0510,<br>257.5527,336.6956           | Justicidin B                        | 364.0947 | 364.0958 | 3.02  |
| Alkaloids | 0.93  | C <sub>4</sub> H <sub>2</sub> N <sub>6</sub> O <sub>5</sub> | 215.0153[M+H] <sup>+</sup> | 236.9973,300.1179,328.1735,451.0054                                | Azoxifyroxan                        | 214.0087 | 214.0080 | -3.27 |
|           | 4.28  | C <sub>22</sub> H <sub>26</sub> O <sub>12</sub>             | 483.1449[M+H] <sup>+</sup> | 484.1491,493.1663,498.1287,502.1594,<br>501.1559,505.1274,         | Catalposide                         | 482.1413 | 482.1378 | -7.26 |
|           | 4.98  | C <sub>32</sub> H <sub>18</sub> N <sub>8</sub>              | 515.1720[M+H] <sup>+</sup> | 97.6047,164.9198,229.5703,277.1387,<br>335.6916,453.1685,458.7985  | Phthalocyanine                      | 514.1654 | 514.1647 | -1.36 |

|       |                                                                |                            |                                                                             |                                                                                |          |          |       |
|-------|----------------------------------------------------------------|----------------------------|-----------------------------------------------------------------------------|--------------------------------------------------------------------------------|----------|----------|-------|
| 5.55  | C <sub>20</sub> H <sub>24</sub> O <sub>10</sub>                | 423.1253[M-H] <sup>-</sup> | 459.1024,469.1302,470.1341,491.1127,<br>487.1243,537.1177,                  | 4-[4-(3-Phenyl-2-<br>quinoxaliny1)phthalonitrile                               | 424.1324 | 424.1324 | -0.02 |
| 5.93  | C <sub>30</sub> H <sub>22</sub> N <sub>4</sub> O <sub>4</sub>  | 501.1550[M-H] <sup>-</sup> | 108.0192,152.0090,167.0323,203.3555,<br>257.8456,336.2625,443.2260,483.0473 | Adozelesin                                                                     | 502.1641 | 502.1622 | -3.78 |
| 6.07  | C <sub>15</sub> H <sub>18</sub> O <sub>4</sub>                 | 263.1267[M+H] <sup>+</sup> | 245.1164,246.1197,252.0165,256.2625,<br>263.0905,264.1301                   | Helenalin                                                                      | 262.1205 | 262.1195 | -3.82 |
| 7.15  | C <sub>19</sub> H <sub>20</sub> N <sub>6</sub> O <sub>6</sub>  | 429.1499[M+H] <sup>+</sup> | 73.3219,99.9389,159.3115,280.2348,<br>336.4270                              | Azido-Thalidomide                                                              | 428.1444 | 428.1426 | -4.20 |
| 7.30  | C <sub>18</sub> H <sub>26</sub> N <sub>2</sub> O <sub>9</sub>  | 415.1714[M+H] <sup>+</sup> | 97.5952,119.0851,165.0083,203.5988,<br>283.8736,302.1422                    | Nicametate citrate                                                             | 414.1638 | 414.1641 | 0.72  |
| 7.38  | C <sub>37</sub> H <sub>28</sub> O <sub>10</sub>                | 633.1777[M+H] <sup>+</sup> | 73.2979,136.3197,203.6463,280.0282,<br>331.0996,430.3708,659.0159           | Pyranoamentoflavone                                                            | 632.1683 | 632.1705 | 3.48  |
| 8.11  | C <sub>18</sub> H <sub>22</sub> N <sub>2</sub> O <sub>10</sub> | 427.1339[M+H] <sup>+</sup> | 86.7829,164.9422,230.0534,257.9796,<br>280.0273                             | Nitrophenyl 2-acetamido-<br>3,6-di-O-acety-2-deoxyl-<br>beta-D-glucopyranoside | 426.1274 | 426.1266 | -1.88 |
| 13.89 | C <sub>19</sub> H <sub>38</sub> N <sub>2</sub> O <sub>3</sub>  | 343.2942[M+H] <sup>+</sup> | 344.2977,355.1502,359.2180,365.2754,                                        | N-Pentadecyl-L-asparagine                                                      | 342.2882 | 342.2862 | -5.84 |

|                   |                                                 |                            |                                                                          |                                   |          |          |       |
|-------------------|-------------------------------------------------|----------------------------|--------------------------------------------------------------------------|-----------------------------------|----------|----------|-------|
| 366.2796,367.2828 |                                                 |                            |                                                                          |                                   |          |          |       |
| 13.94             | C <sub>16</sub> H <sub>35</sub> NO <sub>2</sub> | 274.2727[M+H] <sup>+</sup> | 88.0758,106.0861,136.3367,182.3171,<br>230.2467,256.2624                 | Lauryldimethylammonium<br>Acetate | 273.2668 | 273.2654 | -5.12 |
| 14.03             | C <sub>14</sub> H <sub>31</sub> NO              | 230.2470[M+H] <sup>+</sup> | 57.0704,71.0858,85.1010,162.4451,<br>212.2366                            | Lauryldimethylamine oxide         | 229.2406 | 229.2397 | -3.93 |
| 16.29             | C <sub>18</sub> H <sub>39</sub> NO <sub>2</sub> | 302.3038[M+H] <sup>+</sup> | 60.0448,67.0545,97.6030,136.2916,<br>199.2474,257.2421,315.6597          | Safingol                          | 301.2981 | 301.2966 | -4.98 |
| 17.51             | C <sub>21</sub> H <sub>37</sub> N               | 304.2984[M+H] <sup>+</sup> | 56.0500,74.0603,86.0602,114.0547,185.0913,<br>214.1175,240.1339,286.1386 | N,N-Dimethylandrostan-1-<br>amine | 303.2926 | 303.2913 | -4.29 |
| 19.60             | C <sub>7</sub> H <sub>17</sub> N                | 332.3295[M+H] <sup>+</sup> | 69.0339,85.0285,108.0806,152.0700,<br>170.0805,296.1121,314.1220         | N,N-dimethylpentan-3-amine        | 331.3239 | 331.3223 | -4.83 |
| 20.39             | C <sub>22</sub> H <sub>47</sub> NO <sub>2</sub> | 358.3662[M+H] <sup>+</sup> | 88.0757,106.0862,171.9193,280.3222,<br>340.3531                          | Ammonium Behenate                 | 357.3607 | 357.3589 | -5.04 |
| 20.65             | C <sub>22</sub> H <sub>47</sub> N               | 326.3760[M+H] <sup>+</sup> | 88.0757,120.5113,163.5201,217.5699,<br>280.3684,336.7197                 | Docosylamine                      | 325.3709 | 325.3688 | -6.45 |
| 23.36             | C <sub>18</sub> H <sub>35</sub> NO              | 282.2780[M+H] <sup>+</sup> | 69.0702,79.0544,93.0696,114.6098,                                        | 9-Octadecenamide                  | 281.2719 | 281.2707 | -4.27 |

|          |       |                                                               |                            |                                                                           |                        |          |          |       |
|----------|-------|---------------------------------------------------------------|----------------------------|---------------------------------------------------------------------------|------------------------|----------|----------|-------|
|          |       |                                                               |                            |                                                                           |                        |          |          |       |
| Flavones |       |                                                               |                            | 165.7358,204.1355,239.4173,252.2677                                       |                        |          |          |       |
|          | 25.33 | C <sub>18</sub> H <sub>37</sub> NO                            | 284.2937[M+H] <sup>+</sup> | 60.0812,64.4404,97.6987,136.1072,<br>165.1863,258.8271                    | Amide C18              | 283.2875 | 283.2865 | -3.53 |
|          | 25.58 | C <sub>20</sub> H <sub>41</sub> NO                            | 312.3249[M+H] <sup>+</sup> | 60.0812,71.0859,114.5454,164.9558,<br>195.2109,257.5814,280.3989          | N,N-Dimethylstearamide | 311.3188 | 311.3176 | -3.85 |
|          | 35.14 | C <sub>19</sub> H <sub>30</sub> O <sub>5</sub>                | 337.2022[M-H] <sup>-</sup> | 87.0441,144.1014,216.1231,280.0885,<br>458.4151,601.66689                 | Dodecyl gallate        | 338.2093 | 338.2097 | 1.18  |
|          | 0.70  | C <sub>30</sub> H <sub>22</sub> O <sub>10</sub>               | 543.1296[M+H] <sup>+</sup> | 84.1270,130.9075,219.0466,275.8246,<br>381.0754                           | Isochamaejasmin        | 542.1213 | 542.1223 | 1.84  |
|          | 0.85  | C <sub>30</sub> H <sub>26</sub> O <sub>13</sub>               | 595.1429[M+H] <sup>+</sup> | 599.1153,600.8674,610.11832,617.1251                                      | Proanthocyanidins      | 594.1373 | 594.1357 | -2.69 |
|          | 0.92  | C <sub>15</sub> H <sub>12</sub> O <sub>7</sub>                | 303.0501[M-H] <sup>-</sup> | 66.7697,97.6141,114.5622,136.0435,<br>152.0111,164.6883,176.0458,280.3682 | Taxifolin              | 304.0583 | 304.0573 | -3.29 |
|          | 2.49  | C <sub>15</sub> H <sub>14</sub> O <sub>6</sub>                | 289.0691[M-H] <sup>-</sup> | 71.9295,83.0839,136.2927,170.9135,<br>188.9288,222.4876,267.8817          | (-)-Epicatechin (-)    | 290.0790 | 290.0763 | -9.31 |
|          | 3.16  | C <sub>30</sub> H <sub>26</sub> O <sub>12</sub>               | 579.1475[M+H] <sup>+</sup> | 580.1511,597.0983,601.1295,603.1353                                       | Procyanidin B2         | 578.1424 | 578.1403 | -3.63 |
|          | 3.31  | C <sub>21</sub> H <sub>23</sub> N <sub>3</sub> O <sub>7</sub> | 430.1586[M+H] <sup>+</sup> | 60.0442,119.0727,135.0673,269.1271,                                       | Amicycline             | 429.1536 | 429.1511 | -5.83 |



|       |                                                 |                            |                                                                             |                 |          |          |       |  |
|-------|-------------------------------------------------|----------------------------|-----------------------------------------------------------------------------|-----------------|----------|----------|-------|--|
|       |                                                 |                            | 315.1324,385.1376,412.1488                                                  |                 |          |          |       |  |
| 3.91  | C <sub>30</sub> H <sub>26</sub> O <sub>11</sub> | 563.1523[M+H] <sup>+</sup> | 564.1564,577.1325,583.1194,586.1382,<br>585.1345                            | Gambiriin C     | 562.1475 | 562.1451 | -4.27 |  |
| 4.45  | C <sub>30</sub> H <sub>26</sub> O <sub>12</sub> | 577.1266[M-H] <sup>-</sup> | 435.1888,425.0832,388.3732,336.7420,<br>287.0536,114.6605,84.2190           | Procyanidin B3  | 577.1352 | 577.1330 | -3.81 |  |
| 4.47  | C <sub>26</sub> H <sub>28</sub> O <sub>15</sub> | 581.1451[M+H] <sup>+</sup> | 73.2671,136.2991,259.0784,321.8570,<br>458.2133                             | Neocarlinoside  | 580.1428 | 580.1378 | -8.62 |  |
| 4.92  | C <sub>24</sub> H <sub>22</sub> O <sub>13</sub> | 519.1084[M+H] <sup>+</sup> | 84.2492,206.0509,280.0524,336.8967,<br>458.4076,492.8540                    | Malonylgenistin | 518.1060 | 518.1020 | -7.72 |  |
| 7.25  | C <sub>28</sub> H <sub>34</sub> O <sub>15</sub> | 611.1946[M+H] <sup>+</sup> | 612.1982,613.2014,624.2109,625.2231,<br>627.2388,628.2422,634.1799,633.1761 | Hesperidin      | 610.1898 | 610.1865 | -5.41 |  |
| 8.86  | C <sub>15</sub> H <sub>11</sub> O <sub>6</sub>  | 288.2873[M+H] <sup>+</sup> | 57.0701 ,290.9060,291.1939,310.2344                                         | Cyanidin cation | 287.2437 | 287.2436 | -0.35 |  |
| 35.14 | C <sub>19</sub> H <sub>30</sub> O <sub>5</sub>  | 337.2022[M-H] <sup>-</sup> | 87.0441,144.1014,216.1231,280.0885,<br>458.4151,601.66689                   | Dodecyl gallate | 338.2093 | 338.2097 | 1.18  |  |
| 35.56 | C <sub>27</sub> H <sub>32</sub> O <sub>14</sub> | 579.1681[M-H] <sup>-</sup> | 84.2382,136.3153,203.7300,258.4631,<br>285.0735,335.8143,512.5865           | Naringin        | 580.1792 | 580.1746 | -7.93 |  |

|                  |       |                                                               |                            |                                                                             |                                                        |          |          |       |
|------------------|-------|---------------------------------------------------------------|----------------------------|-----------------------------------------------------------------------------|--------------------------------------------------------|----------|----------|-------|
|                  |       |                                                               |                            |                                                                             |                                                        |          |          |       |
|                  | 35.60 | C <sub>28</sub> H <sub>34</sub> O <sub>15</sub>               | 609.1783[M-H] <sup>-</sup> | 73.2979,165.0048,203.5915,257.8745,<br>294.2006,335.8289,361.9692,458.4070  | Neohesperidin                                          | 610.1898 | 610.1848 | -8.20 |
|                  | 0.71  | C <sub>12</sub> H <sub>21</sub> N <sub>3</sub> O <sub>6</sub> | 304.1489[M+H] <sup>+</sup> | 286.1384,287.1419,293.0620,295.1124,<br>299.0604,305.1526                   | Boc-Ala-Gly-Gly                                        | 303.1430 | 303.1417 | -4.29 |
|                  | 0.94  | C <sub>11</sub> H <sub>20</sub> N <sub>2</sub> O <sub>3</sub> | 229.1536[M+H] <sup>+</sup> | 73.2895,87.3019,115.0539,128.0615,<br>157.0648,185.0580,213.0544            | Pro-leu                                                | 228.1474 | 228.1464 | -4.38 |
|                  | 0.95  | C <sub>10</sub> H <sub>13</sub> NO <sub>2</sub>               | 180.1012[M+H] <sup>+</sup> | 77.0387,95.0491,117.0569,121.0646,<br>146.0594,149.0464,165.0778            | Phenprobamate                                          | 179.0946 | 179.0939 | -3.91 |
| Organic<br>acids | 1.22  | C <sub>5</sub> H <sub>11</sub> NO <sub>2</sub>                | 118.0860[M+H] <sup>+</sup> | 55.0548,57.0578,72.0811,76.9332,84.1696,<br>94.9434,105.0449                | Valine                                                 | 118.1194 | 118.1187 | -5.93 |
|                  | 4.51  | C <sub>11</sub> H <sub>18</sub> N <sub>2</sub> O <sub>2</sub> | 211.1433[M+H] <sup>+</sup> | 73.0961, 97.4816,215.1423,233.1246,<br>249.0979                             | Cyclo(leucylprolyl)                                    | 210.1368 | 210.1351 | -8.09 |
|                  | 5.34  | C <sub>24</sub> H <sub>39</sub> N <sub>7</sub> O <sub>8</sub> | 554.2948[M+H] <sup>+</sup> | 277.6509,307.1140,336.1540,447.1245,<br>456.2304,455.2260,554.2948,576.2767 | L-Threonyl-L-histidyl-L-<br>threonyl-L-valyl-L-proline | 553.2868 | 553.2871 | 0.54  |
|                  | 6.43  | C <sub>9</sub> H <sub>14</sub> N <sub>2</sub> O <sub>7</sub>  | 261.0741[M+H] <sup>+</sup> | 74.0226,78.9569,84.1472,97.6159,<br>136.2830,164.6517,185.3136              | Asp-Glu                                                | 262.0801 | 262.0814 | 4.96  |
|                  |       |                                                               |                            |                                                                             |                                                        |          |          |       |

|       |                                                               |                            |                                                                          |                                                                                           |          |          |        |
|-------|---------------------------------------------------------------|----------------------------|--------------------------------------------------------------------------|-------------------------------------------------------------------------------------------|----------|----------|--------|
| 9.36  | C <sub>6</sub> H <sub>12</sub> N <sub>2</sub> O <sub>4</sub>  | 213.1092[M+H] <sup>+</sup> | 64.9172,73.2878,77.0022,82.7814,<br>107.6133,203.2191                    | Glycyl-D-threonine                                                                        | 212.1008 | 212.1020 | 5.66   |
| 11.10 | C <sub>10</sub> H <sub>5</sub> O <sub>3</sub>                 | 174.0305[M+H] <sup>+</sup> | 64.4148,84.0339,89.0387,118.0413,<br>130.0650,144.0799,174.1273,178.6506 | Oxo-4-phenyl-3-butynoate                                                                  | 173.0239 | 173.0232 | -4.05  |
| 11.32 | C <sub>24</sub> H <sub>20</sub> O <sub>10</sub>               | 469.1081[M+H] <sup>+</sup> | 97.5589,136.3375,232.0696,280.0370,<br>302.6043,338.5459,458.5816        | Gyrophoric acid (-)                                                                       | 468.1056 | 468.1009 | -10.04 |
| 13.35 | C <sub>10</sub> H <sub>16</sub> N <sub>2</sub> O <sub>8</sub> | 293.0986[M+H] <sup>+</sup> | 105.1869,147.0463,203.1051,315.0805,<br>336.4451,                        | Ethylenediaminetetraacetic<br>acid                                                        | 292.0907 | 292.0913 | 2.05   |
| 19.67 | C <sub>24</sub> H <sub>40</sub> O <sub>2</sub>                | 361.3096[M+H] <sup>+</sup> | 362.9249,363.1765,365.1172                                               | 5β-cholanoic acid                                                                         | 360.3028 | 360.3023 | -1.39  |
| 27.78 | C <sub>19</sub> H <sub>38</sub> N <sub>2</sub> O <sub>6</sub> | 391.2825[M+H] <sup>+</sup> | 114.5523,203.7558,336.7654                                               | 2,3-dihydroxybutanedioic<br>acid                                                          | 390.2730 | 390.2743 | 3.33   |
| 30.62 | C <sub>15</sub> H <sub>22</sub> O <sub>3</sub>                | 249.1480[M-H] <sup>-</sup> | 58.2773, 114.4650, 189.1255,254.2472                                     | gemfibrozil                                                                               | 250.1569 | 250.1553 | -6.40  |
| 32.15 | C <sub>44</sub> H <sub>58</sub> N <sub>2</sub> O <sub>3</sub> | 663.4490[M+H] <sup>+</sup> | 677.4929,685.4312,686.4351,708.5075,<br>709.5111,726.4582                | 4-[28-Oxo-28-{[2-(2-<br>pyridinyl)ethyl]amino}lupa-<br>2,20(29)-dien-3-yl]benzoic<br>acid | 662.4447 | 662.4418 | -4.38  |

|          |       |                                                               |                            |                                                           |                                |          |          |       |
|----------|-------|---------------------------------------------------------------|----------------------------|-----------------------------------------------------------|--------------------------------|----------|----------|-------|
|          | 32.22 | C <sub>39</sub> H <sub>58</sub> N <sub>4</sub> O <sub>5</sub> | 663.4498[M+H] <sup>+</sup> | 726.4586,975.8096,989.8241,1347.8759                      | 3-hexanoyl-NBD Cholesterol     | 662.4407 | 662.4420 | 1.96  |
|          | 32.34 | C <sub>26</sub> H <sub>52</sub> O <sub>3</sub>                | 411.3804[M-H] <sup>-</sup> | 73.1553,114.6528,164.8311,335.9418,<br>365.3743           | 26-Hydroxyhexacosanoic<br>acid | 412.3916 | 412.3876 | -9.70 |
|          | 33.68 | C <sub>6</sub> H <sub>8</sub> O <sub>7</sub>                  | 191.0170[M-H] <sup>-</sup> | 84.1572,97.6019,114.3242,136.0959,<br>144.9627,203.8123   | Citric Acid                    | 192.0270 | 192.0289 | 9.90  |
| Steroids | 0.74  | C <sub>11</sub> H <sub>15</sub> N <sub>5</sub> O <sub>3</sub> | 266.1222[M+H] <sup>+</sup> | 248.1180,259.0913,260.0729,266.1586                       | Lobucavir                      | 265.1175 | 265.1150 | -9.43 |
|          | 4.63  | C <sub>22</sub> H <sub>14</sub>                               | 279.1189[M+H] <sup>+</sup> | 84.1490,97.4164,136.1072,181.3166,<br>203.4637,257.2826   | Pentaphene                     | 278.1096 | 278.1117 | 7.55  |
|          | 15.37 | C <sub>24</sub> H <sub>30</sub> O <sub>6</sub>                | 415.2101[M+H] <sup>+</sup> | 437.1914,438.1953,439.1979,453.1657                       | Meprednisone Acetate           | 414.2042 | 414.2024 | -4.35 |
| Quinones | 5.20  | C <sub>32</sub> H <sub>28</sub> O <sub>9</sub>                | 555.1668[M-H] <sup>-</sup> | 573.1180,588.8926,601.1722,605.8829,<br>618.1621,669.1593 | Shikometabolin B               | 556.1733 | 556.1739 | 1.08  |
|          | 6.66  | C <sub>27</sub> H <sub>30</sub> O <sub>13</sub>               | 563.1708[M+H] <sup>+</sup> | 64.4161,136.3428,204.1910,269.6362,<br>336.5809,436.4548  | Lignan P                       | 562.1686 | 562.1636 | -8.89 |
|          | 32.18 | C <sub>17</sub> H <sub>26</sub> O <sub>4</sub>                | 293.1765[M-H] <sup>-</sup> | 73.2748,79.9553,96.9578,114.6741,<br>136.3411,165.1391    | Embelin                        | 294.1831 | 294.1836 | 1.70  |
|          | 35.53 | C <sub>19</sub> H <sub>30</sub> O <sub>4</sub>                | 321.2076[M-H] <sup>-</sup> | 337.2025,347.1308,339.1973,353.1972,                      | Decylubiquinone                | 322.2144 | 322.2145 | 0.31  |

|  |       |                                               |                            |                                                       |           |          |          |       |
|--|-------|-----------------------------------------------|----------------------------|-------------------------------------------------------|-----------|----------|----------|-------|
|  |       |                                               |                            | 354.2006,365.2335,381.2283                            |           |          |          |       |
|  | 35.63 | C <sub>11</sub> H <sub>8</sub> O <sub>3</sub> | 187.0397[M-H] <sup>-</sup> | 71.5846,78.9566,84.1446,97.5875,<br>114.5366,136.3169 | Plumbagin | 188.0473 | 188.0470 | -1.60 |

Table S2 Chemicals in *F. carica* root exudates

| Type of compound | RT (min) | Formula                                        | [M-H] <sup>-</sup> /<br>[M+H] <sup>+</sup> | Main Ms/Ms product ions                                     | Proposed compound | Theoretical Mass (m/z) | Measured value (m/z) | Error (×10 <sup>-6</sup> ) |
|------------------|----------|------------------------------------------------|--------------------------------------------|-------------------------------------------------------------|-------------------|------------------------|----------------------|----------------------------|
| Coumarins        | 3.94     | C <sub>9</sub> H <sub>6</sub> O <sub>4</sub>   | 179.0331[M+H] <sup>+</sup>                 | 151.0382,133.0281,123.0437,105.0338,95.0492,77.0388,68.9974 | Esculetin         | 179.0339               | 179.0332             | -3.91                      |
|                  | 4.88     | C <sub>11</sub> H <sub>6</sub> O <sub>4</sub>  | 201.0177[M-H] <sup>-</sup>                 | 75.0232, 95.0494,131.0487,75.0383,204.9552                  | Xanthotoxol       | 202.0266               | 202.0250             | -7.92                      |
|                  | 5.57     | C <sub>9</sub> H <sub>6</sub> O <sub>3</sub>   | 163.0384[M+H] <sup>+</sup>                 | 135.0434,116.9659,107.0490,105.0446,95.0492,89.0388,79.0544 | Umbelliferone     | 163.0389               | 163.0385             | -2.45                      |
|                  | 6.47     | C <sub>14</sub> H <sub>14</sub> O <sub>4</sub> | 247.0955[M+H] <sup>+</sup>                 | 229.0851,213.0535,175.0383,147.043                          | Marmesin          | 247.0965               | 247.0958             | -2.83                      |

|                             |                                                |                            |                                                                   |                  |          |          |       |
|-----------------------------|------------------------------------------------|----------------------------|-------------------------------------------------------------------|------------------|----------|----------|-------|
| 4,119.0490,103.0541,91.0543 |                                                |                            |                                                                   |                  |          |          |       |
| 6.77                        | C <sub>14</sub> H <sub>12</sub> O <sub>3</sub> | 229.0852[M+H] <sup>+</sup> | 213.0544,185.0580,157.0648,128.061<br>5,115.0539,87.3019,73.2895  | Angenomalin      | 229.0859 | 229.0852 | -3.06 |
| 9.63                        | C <sub>11</sub> H <sub>6</sub> O <sub>3</sub>  | 187.0382[M+H] <sup>+</sup> | 159.0436,143.0486,131.0486,115.054<br>0,105.0445,95.0492,89.0387  | Psoralen         | 187.0390 | 187.0383 | -3.74 |
| 8.17                        | C <sub>14</sub> H <sub>14</sub> O <sub>4</sub> | 247.0954[M+H] <sup>+</sup> | 91.0543,119.0488,147.0433,175.0381,<br>185.0589,247.0954          | Nodakenetin      | 246.0892 | 246.0868 | -9.75 |
| 8.26                        | C <sub>14</sub> H <sub>14</sub> O <sub>4</sub> | 247.0952[M+H] <sup>+</sup> | 229.0847,213.0539,175.0382,147.043<br>4,115.0543,91.0544,68.9973  | Columbianetin    | 247.0965 | 247.0958 | -2.83 |
| 11.21                       | C <sub>12</sub> H <sub>8</sub> O <sub>4</sub>  | 217.0487[M+H] <sup>+</sup> | 202.0251,174.0302,161.0588,146.035<br>4,131.0486,118.0411,89.0386 | Bergapten        | 217.0495 | 217.0490 | -3.20 |
| 25.70                       | C <sub>21</sub> H <sub>24</sub> O <sub>5</sub> | 355.1557[M-H] <sup>-</sup> | 84.0734, 116.9266, 203.7526,<br>280.7447,321.9117                 | Rutamarin        | 356.1624 | 356.1630 | 1.68  |
| 35.59                       | C <sub>11</sub> H <sub>10</sub> O <sub>3</sub> | 189.0562[M-H] <sup>-</sup> | 64.4359,91.0166,165.0012,187.8595,1<br>92.9274                    | 7-Ethoxycoumarin | 190.0630 | 190.0635 | 2.63  |

|            |       |                                                               |                             |                                                            |                                               |          |          |       |
|------------|-------|---------------------------------------------------------------|-----------------------------|------------------------------------------------------------|-----------------------------------------------|----------|----------|-------|
| Terpenoids | 0.73  | C <sub>13</sub> H <sub>16</sub> N <sub>4</sub> O <sub>6</sub> | 347.0922[M+Na] <sup>+</sup> | 326.1148, ,337.1090,472.4404,649.21<br>33,671.1952         | Furaltadone                                   | 324.1069 | 324.1039 | -0.26 |
|            | 3.66  | C <sub>20</sub> H <sub>24</sub> O <sub>10</sub>               | 423.1253[M-H] <sup>-</sup>  | 427.2417,459.1024,469.1302,470.134<br>1487.1243,537.1177,  | Ginkgolide B                                  | 424.1369 | 424.1329 | -9.43 |
|            | 4.22  | C <sub>11</sub> H <sub>15</sub> N <sub>3</sub> O <sub>8</sub> | 318.0926[M+H] <sup>+</sup>  | 317.8994,319.0959,321.2377,322.247<br>3                    | Polyoxin C                                    | 317.0859 | 317.0853 | -1.89 |
|            | 7.23  | C <sub>25</sub> H <sub>22</sub> N <sub>2</sub> O <sub>5</sub> | 429.1515[M-H] <sup>-</sup>  | 96.9582,259.6032,336.7244,410.4415,<br>433.2337            | Zanamivir Amine<br>Triacetate Methyl<br>Ester | 430.1587 | 430.1590 | 4.97  |
|            | 10.57 | C <sub>28</sub> H <sub>22</sub>                               | 359.1801[M+H] <sup>+</sup>  | 96.0181,143.3853257.1088,362.3235                          | 9,10-Bis(4-<br>methylphenyl)anth<br>racene    | 358.1721 | 358.1728 | 1.95  |
|            | 15.30 | C <sub>26</sub> H <sub>26</sub> O <sub>9</sub>                | 483.1589[M+H] <sup>+</sup>  | 136.3201,280.0822,393.1639,486.107<br>9                    | Gilvocarcin M                                 | 482.1577 | 482.1536 | -8.50 |
|            | 19.36 | C <sub>20</sub> H <sub>22</sub> O <sub>2</sub>                | 295.1675 [M+H] <sup>+</sup> | 76.9574, 90.9763, 111.3316,<br>222.2712,280.9984, 296/1668 | Longistylin A                                 | 294.1620 | 294.1603 | -5.78 |
|            |       |                                                               |                             |                                                            |                                               |          |          |       |

|           |       |                                                               |                            |                                                           |                                    |          |          |       |
|-----------|-------|---------------------------------------------------------------|----------------------------|-----------------------------------------------------------|------------------------------------|----------|----------|-------|
|           | 24.10 | C <sub>14</sub> H <sub>26</sub> O <sub>4</sub>                | 259.1883[M+H] <sup>+</sup> | 55.0545, 101.0591, 129.0538,<br>147.0638,203.3184         | Tetradecaneioic<br>acid            | 258.1831 | 258.1811 | -7.75 |
|           | 26.91 | C <sub>38</sub> H <sub>49</sub> N <sub>3</sub> O <sub>5</sub> | 628.3688[M+H] <sup>+</sup> | 114.5062,<br>280.3070,371.1017,631.4135                   | Bemotrizinol                       | 627.3672 | 627.3645 | -4.30 |
|           | 27.27 | C <sub>24</sub> H <sub>38</sub> O <sub>4</sub>                | 391.2807[M+H] <sup>+</sup> | 91.9828,169.9946,256.8141,395.4211                        | Diocetyl phthalate                 | 390.2770 | 390.2745 | -8.61 |
|           | 27.76 | C <sub>25</sub> H <sub>35</sub> NO <sub>4</sub>               | 412.2473[M-H] <sup>-</sup> | 64.4214,97.5916280.0219,338.3460,4<br>15.8739             | Norbuprenorphine                   | 413.2566 | 413.2546 | -4.84 |
|           | 31.46 | C <sub>15</sub> H <sub>22</sub> O <sub>4</sub>                | 265.1463[M-H] <sup>-</sup> | 97.3725,203.5167, 257.2839,268.7779                       | Zinniol                            | 266.1518 | 266.1536 | 6.76  |
|           | 31.94 | C <sub>12</sub> H <sub>16</sub> O                             | 175.1133[M-H] <sup>-</sup> | 59.9656, 75.9604, 92.9997,<br>114.6072,157.1029, 175.1133 | 4-<br>Cyclohexylphenol             | 176.1201 | 176.1206 | 2.84  |
|           | 34.61 | C <sub>17</sub> H <sub>26</sub> O <sub>5</sub>                | 309.1712[M-H] <sup>-</sup> | 64.4856,79.9556,97.5921,134.9214,20<br>3.6785,309.1715    | Decyl Gallate                      | 310.1780 | 310.1794 | 4.51  |
|           | 0.82  | C <sub>14</sub> H <sub>21</sub> NO <sub>3</sub>               | 250.1438[M-H] <sup>-</sup> | 97.3690, 164.9332, 206.9735,<br>207.9814,252.9719         | 2,6-ditert-butyl-4-<br>nitrophenol | 251.1521 | 251.1501 | -7.96 |
| Alkaloids | 0.90  | C <sub>21</sub> H <sub>16</sub> O <sub>6</sub>                | 365.1027[M+H] <sup>+</sup> | 114.3890,185.0413,203.0508,336.690<br>5,368.8889          | Justicidin B                       | 364.0947 | 364.0955 | 2.20  |



|      |                                                                |                            |                                                            |                                                                                        |          |          |       |
|------|----------------------------------------------------------------|----------------------------|------------------------------------------------------------|----------------------------------------------------------------------------------------|----------|----------|-------|
| 0.93 | C <sub>4</sub> H <sub>2</sub> N <sub>6</sub> O <sub>5</sub>    | 215.0150[M+H] <sup>+</sup> | 215.0150,236.9968,300.1179,<br>451.0054                    | Azoxyfuroxan                                                                           | 214.0087 | 214.0077 | -4.67 |
| 1.22 | C <sub>13</sub> H <sub>20</sub> N <sub>2</sub> O <sub>6</sub>  | 301.1388[M+H] <sup>+</sup> | 73.0467, 91.0569, 114.4321,<br>205.4325,280.9338, 301.0567 | 5-Butyluridine                                                                         | 300.1321 | 300.1315 | -1.20 |
| 5.55 | C <sub>20</sub> H <sub>24</sub> O <sub>10</sub>                | 425.1392[M+H] <sup>+</sup> | 427.2417,459.1023,491.1127,537.117<br>7                    | 4-[4-(3-Phenyl-2-<br>quinoxaliny)phtha<br>lonitrile                                    | 424.1324 | 424.1319 | -1.18 |
| 6.07 | C <sub>15</sub> H <sub>18</sub> O <sub>4</sub>                 | 285.1187[M+H] <sup>+</sup> | 245.1164,<br>264.1301,268.2433,275.8894                    | Helenalin                                                                              | 262.1205 | 262.1228 | 8.77  |
| 7.38 | C <sub>37</sub> H <sub>28</sub> O <sub>10</sub>                | 633.1778[M+H] <sup>+</sup> | 203.6466,331.0993,659.0158,677.165<br>8,690.8776           | Pyranoamentoflavo<br>ne                                                                | 632.1683 | 632.1672 | -1.74 |
| 8.11 | C <sub>18</sub> H <sub>22</sub> N <sub>2</sub> O <sub>10</sub> | 427.1331[M+H] <sup>+</sup> | 164.9422,<br>257.9796,280.0273,430.9106                    | Nitrophenyl 2-<br>acetamido-3,6-di-<br>O-acety-2-deoxyl-<br>beta-D-<br>glucopyranoside | 426.1274 | 426.1258 | -3.75 |

|       |                                                               |                            |                                                          |                                |          |          |       |
|-------|---------------------------------------------------------------|----------------------------|----------------------------------------------------------|--------------------------------|----------|----------|-------|
| 13.94 | C <sub>16</sub> H <sub>35</sub> NO <sub>2</sub>               | 274.2719[M+H] <sup>+</sup> | 136.3369,256.2624,275.2752,277.1235                      | Lauryldimethylammonium Acetate | 273.2668 | 273.2646 | -8.05 |
| 14.03 | C <sub>14</sub> H <sub>31</sub> NO                            | 230.2457[M+H] <sup>+</sup> | 57.0701,71.0855,85.1010,212.2354,233.4803                | Lauryldimethylamine oxide      | 229.2406 | 229.2384 | -9.59 |
| 16.29 | C <sub>18</sub> H <sub>39</sub> NO <sub>2</sub>               | 302.3023[M+H] <sup>+</sup> | 60.0446,88.0754,136.2916,284.2925,302.3024               | Safingol                       | 301.2981 | 301.2951 | -9.96 |
| 17.32 | C <sub>15</sub> H <sub>18</sub> N <sub>6</sub> O <sub>2</sub> | 313.1429[M-H] <sup>-</sup> | 61.4773, 114.2076, 136.3569, 199.0752,203.5463, 335.7993 | Pimefylline                    | 314.1491 | 314.1502 | 3.50  |
| 17.51 | C <sub>21</sub> H <sub>37</sub> N                             | 304.2975[M+H] <sup>+</sup> | 56.0507, 86.0603, 185.0920,308.8875                      | N,N-Dimethylandrostan-1-amine  | 303.2926 | 303.2902 | -7.91 |
| 19.60 | C <sub>7</sub> H <sub>17</sub> N                              | 332.3284[M+H] <sup>+</sup> | 108.0809,314.1223,336.6591                               | N,N-dimethylpentan-3-amine     | 331.3239 | 331.3211 | -8.45 |
| 20.39 | C <sub>22</sub> H <sub>47</sub> NO <sub>2</sub>               | 358.3641[M+H] <sup>+</sup> | 88.0754,106.0856,203.0471,340.3553,358.3646,380.3467     | Ammonium Behenate              | 357.3607 | 357.3575 | -8.95 |

|          |       |                                                 |                            |                                                                      |                        |          |          |       |
|----------|-------|-------------------------------------------------|----------------------------|----------------------------------------------------------------------|------------------------|----------|----------|-------|
| Flavones | 25.33 | C <sub>18</sub> H <sub>37</sub> NO              | 284.2924[M+H] <sup>+</sup> | 74.0599,97.6989, 102.0907, 136.1073,<br>284.2923, 325.3188, 567.5776 | Amide C18              | 283.2875 | 283.2851 | -8.47 |
|          | 24.44 | C <sub>22</sub> H <sub>43</sub> NO              | 338.3385[M+H] <sup>+</sup> | 69.0699, 135.1155, 177.1619,<br>321.3116,568.5607,675.6696           | Erucamide              | 337.3340 | 337.3313 | -8.00 |
|          | 25.58 | C <sub>20</sub> H <sub>41</sub> NO              | 312.3233[M+H] <sup>+</sup> | 60.0816, 164.9563,<br>280.3967,316.6825                              | N,N-Dimethylstearamide | 311.3188 | 311.3161 | -8.67 |
|          | 35.14 | C <sub>19</sub> H <sub>30</sub> O <sub>5</sub>  | 337.2022[M-H] <sup>-</sup> | 144.1016,280.0887,397.2227,458.415<br>3,601.6668                     | Dodecyl gallate        | 338.2093 | 338.2093 | 0.03  |
|          | 0.85  | C <sub>30</sub> H <sub>26</sub> O <sub>13</sub> | 593.1266[M-H] <sup>-</sup> | 595.8555,599.1167,600.8658,617.126<br>2                              | Proanthocyanidins      | 594.1373 | 594.1339 | -5.72 |
|          | 0.92  | C <sub>15</sub> H <sub>12</sub> O <sub>7</sub>  | 305.0663[M+H] <sup>+</sup> | 66.7699,97.6141,136.0452,152.0111,2<br>80.3675,309.1468              | Taxifolin              | 304.0583 | 304.0590 | 2.30  |
|          | 2.49  | C <sub>15</sub> H <sub>14</sub> O <sub>6</sub>  | 291.0819[M+H] <sup>+</sup> | 83.0839,136.2927,170.9135,295.1678                                   | (-)-Epicatechin        | 290.0790 | 290.0766 | -8.27 |
|          | 3.16  | C <sub>30</sub> H <sub>26</sub> O <sub>12</sub> | 579.1477[M+H] <sup>+</sup> | 580.1510,597.0986,601.1297,603.135<br>3                              | Procyanidin B2         | 578.1424 | 578.1404 | -3.46 |
|          |       |                                                 |                            |                                                                      |                        |          |          |       |

|       |                                                               |                            |                                              |                 |          |          |       |
|-------|---------------------------------------------------------------|----------------------------|----------------------------------------------|-----------------|----------|----------|-------|
| 3.31  | C <sub>21</sub> H <sub>23</sub> N <sub>3</sub> O <sub>7</sub> | 430.1601[M+H] <sup>+</sup> | 135.0672,315.1326,412.1479,433.1459          | Amicycline      | 429.1536 | 429.1528 | -1.86 |
| 3.91  | C <sub>30</sub> H <sub>26</sub> O <sub>11</sub>               | 563.1531[M+H] <sup>+</sup> | 564.1567,577.1331,583.8766,586.1382,585.1354 | Gambiriin C     | 562.1475 | 562.1456 | -3.38 |
| 4.45  | C <sub>30</sub> H <sub>26</sub> O <sub>12</sub>               | 577.1299[M-H] <sup>-</sup> | 125.0221,287.0539,388.3730,425.0832,580.8605 | Procyanidin B3  | 577.1352 | 577.1372 | 3.47  |
| 4.92  | C <sub>24</sub> H <sub>22</sub> O <sub>13</sub>               | 517.0975[M-H] <sup>-</sup> | 84.2487,206.0512336.8971,492.8531,520.9053   | Malonylgenistin | 518.1060 | 518.1048 | -2.32 |
| 7.25  | C <sub>28</sub> H <sub>34</sub> O <sub>15</sub>               | 611.1931[M+H] <sup>+</sup> | 610.3386,613.2016,623.1745,627.2378,634.1792 | Hesperidin      | 610.1898 | 610.1854 | -7.21 |
| 8.86  | C <sub>15</sub> H <sub>11</sub> O <sub>6</sub>                | 288.2873[M+H] <sup>+</sup> | 57.0701,290.9060,291.1939,310.2344           | Cyanidin cation | 287.2437 | 287.2436 | -0.35 |
| 23.99 | C <sub>27</sub> H <sub>30</sub> O <sub>16</sub>               | 611.1648[M+H] <sup>+</sup> | 593.1528,611.1648,626.1895,633.1448,649.1186 | Rutin           | 610.1534 | 610.1556 | 3.60  |
| 35.56 | C <sub>27</sub> H <sub>32</sub> O <sub>14</sub>               | 581.1858[M+H] <sup>+</sup> | 136.3155,203.7303,285.0741,512.5867,585.2861 | Naringin        | 580.1792 | 580.1785 | -1.21 |

|               |       |                                                               |                            |                                                             |                                                    |          |          |       |
|---------------|-------|---------------------------------------------------------------|----------------------------|-------------------------------------------------------------|----------------------------------------------------|----------|----------|-------|
| Organic acids | 35.60 | C <sub>28</sub> H <sub>34</sub> O <sub>15</sub>               | 611.1966[M+H] <sup>+</sup> | 294.2013,361.9689,458.4072,613.3403                         | Neohesperidin                                      | 610.1898 | 610.1893 | -0.82 |
|               | 0.95  | C <sub>10</sub> H <sub>13</sub> NO <sub>2</sub>               | 180.1016[M+H] <sup>+</sup> | 95.0493,117.0567, 165.0781,422.2024                         | Phenprobamate                                      | 179.0946 | 179.0935 | -6.14 |
|               | 4.51  | C <sub>11</sub> H <sub>18</sub> N <sub>2</sub> O <sub>2</sub> | 211.1426[M+H] <sup>+</sup> | 73.0959,83.9561,97.4819,136.1328,176.1328,233.1243,249.0981 | Cyclo(leucylprolyl )                               | 210.1368 | 210.1351 | -8.09 |
|               | 5.21  | C <sub>10</sub> H <sub>19</sub> N <sub>7</sub> O <sub>5</sub> | 318.1525[M+H] <sup>+</sup> | 299.1079,304.1732,305.1549,311.1626,321.1287                | neosaxitoxin conjugate acid                        | 317.1448 | 317.1452 | 1.26  |
|               | 5.34  | C <sub>24</sub> H <sub>39</sub> N <sub>7</sub> O <sub>8</sub> | 552.2746[M-H] <sup>-</sup> | 277.6513,336.1521,456.2301,455.2255,553.2782                | L-Threonyl-L-histidyl-L-threonyl-L-valyl-L-proline | 553.2868 | 553.2817 | -9.22 |
|               | 9.36  | C <sub>6</sub> H <sub>12</sub> N <sub>2</sub> O <sub>4</sub>  | 213.0897[M+H] <sup>+</sup> | 64.9182,77.0019,82.7809,203.2190,217.1030                   | Glycyl-D-threonine                                 | 212.1008 | 212.1010 | 0.94  |
|               | 11.10 | C <sub>10</sub> H <sub>5</sub> O <sub>3</sub>                 | 172.0217[M-H] <sup>-</sup> | 84.0338,118.0417,174.1277175.8485                           | Oxo-4-phenyl-3-butyrate                            | 173.0239 | 173.0242 | 1.73  |
|               |       |                                                               |                            |                                                             |                                                    |          |          |       |

|       |                                                               |                            |                                                         |                                                                                |          |          |       |
|-------|---------------------------------------------------------------|----------------------------|---------------------------------------------------------|--------------------------------------------------------------------------------|----------|----------|-------|
| 13.35 | C <sub>10</sub> H <sub>16</sub> N <sub>2</sub> O <sub>8</sub> | 291.0837[M-H] <sup>-</sup> | 84.0577,147.0411,203.1028,336.4466                      | Ethylenediaminetetraacetic acid                                                | 292.0907 | 292.0905 | -0.68 |
| 19.67 | C <sub>24</sub> H <sub>40</sub> O <sub>2</sub>                | 361.3082[M+H] <sup>+</sup> | 362.9230,364.2428,365.1176                              | 5β-cholanoic acid                                                              | 360.3028 | 360.3009 | -5.27 |
| 21.11 | C <sub>14</sub> H <sub>26</sub> N <sub>2</sub> O <sub>6</sub> | 319.1854[M+H] <sup>+</sup> | 318.2976, 320.3041, 321.1282, 323.2189                  | BOC-L-DAB(BOC)                                                                 | 318.1791 | 318.1781 | -3.14 |
| 27.78 | C <sub>19</sub> H <sub>38</sub> N <sub>2</sub> O <sub>6</sub> | 391.2798[M+H] <sup>+</sup> | 114.5523,203.7558,394.2091,413.2632,454.2908,803.5390   | 2,3-dihydroxybutanedioic acid                                                  | 390.2730 | 390.2725 | -1.28 |
| 30.62 | C <sub>15</sub> H <sub>22</sub> O <sub>3</sub>                | 249.1480[M-H] <sup>-</sup> | 58.2769, 84.0887, 114.4633, 189.1253,203.8059, 249.1473 | gemfibrozil                                                                    | 250.1569 | 250.1553 | -6.40 |
| 32.15 | C <sub>44</sub> H <sub>58</sub> N <sub>2</sub> O <sub>3</sub> | 663.4478[M+H] <sup>+</sup> | 685.4294,726.4582,854.3976,1325.8892,1347.8705          | 4-[28-Oxo-28-{[2-(2-pyridinyl)ethyl]amino}lupa-2,20(29)-dien-3-yl]benzoic acid | 662.4447 | 662.4405 | -6.34 |

|          |       |                                                               |                            |                                                             |                                          |          |          |       |
|----------|-------|---------------------------------------------------------------|----------------------------|-------------------------------------------------------------|------------------------------------------|----------|----------|-------|
|          | 32.22 | C <sub>39</sub> H <sub>58</sub> N <sub>4</sub> O <sub>5</sub> | 663.4479[M+H] <sup>+</sup> | 726.4579,928.4164,1008.3908,1325.8<br>89,1347.8713          | 3-hexanoyl-NBD<br><br>Cholesterol        | 662.4407 | 662.4405 | -3.02 |
| Steroids | 5.77  | C <sub>14</sub> H <sub>7</sub> NO <sub>5</sub>                | 270.0384[M+H] <sup>+</sup> | 269.2474, 271.2437, 273.0924                                | 1-Hydroxy-3-nitro-<br>9,10-anthraquinone | 269.0324 | 269.0311 | -4.83 |
|          | 15.37 | C <sub>24</sub> H <sub>30</sub> O <sub>6</sub>                | 415.2074[M+H] <sup>+</sup> | 419.3120,430.9103,437.1899,453.165<br>7                     | Meprednisone<br><br>Acetate              | 414.2042 | 414.2006 | -8.69 |
|          | 27.63 | C <sub>19</sub> H <sub>26</sub> O <sub>6</sub>                | 349.1671[M-H] <sup>-</sup> | 59.9656, 136.0462, 149.0078,<br>191.0551,291.0892, 349.1667 | Arctiopicrin                             | 350.1729 | 350.1744 | 4.28  |
|          | 1.08  | C <sub>11</sub> H <sub>8</sub> O <sub>3</sub>                 | 187.0405[M-H] <sup>-</sup> | 71.5846, 97.5875, 136.3169,190.0131                         | Plumbagin                                | 188.0473 | 188.0470 | -1.60 |
| Quinones | 18.92 | C <sub>19</sub> H <sub>30</sub> O <sub>4</sub>                | 321.2087[M-H] <sup>-</sup> | 322.2120,347.1308,381.2283                                  | Decylubiquinone                          | 322.2144 | 322.2160 | 4.97  |
|          | 20.96 | C <sub>17</sub> H <sub>26</sub> O <sub>4</sub>                | 293.1774[M-H] <sup>-</sup> | 73.2748,96.9583,136.3411,191.8211                           | Embelin                                  | 294.1831 | 294.1846 | 5.10  |
